# Supplementary material for: Adaptive genetic variation for climate-resilient breeding in cacao (Theobroma cacao L.)
Source: Research Square preprint supplement (doi:10.21203/rs.3.rs-7906520/v1), 2025-11-11
Supplement: Supplementary file 1 [file 11727f22c0ceb3616e14dcc9.xlsx]

## Sheet: Sheet1
Spearman's Correlations
Variable		soil pH H2O		cec 0-5 cm		soc 0-5cm		ocd 0-5 cm		ocs 0-30		nitrogen 0-5cm		phosphorous (mg kg-1)		Sand g/100g (%)		Silt g/100g (%)		Clay g/100g(%)		cfvo 0-5cm		bulk density 0-5 cm		Vol. water content at -10 kPa		Vol. water content at -33 kPa		Vol. water content at -1500 kPa		BIO1		BIO2		BIO3		BIO4		BIO5		BIO6		BIO7		BIO8		BIO9
1. soil pH H2O	Spearman's rho	—
2. cec 0-5 cm	Spearman's rho	-0.267	***	—
3. soc 0-5cm	Spearman's rho	-0.184	*	0.768	***	—
4. ocd 0-5 cm	Spearman's rho	-0.025		0.837	***	0.74	***	—
5. ocs 0-30	Spearman's rho	-0.051		0.821	***	0.602	***	0.735	***	—
6. nitrogen 0-5cm	Spearman's rho	-0.458	***	0.771	***	0.485	***	0.646	***	0.596	***	—
7. phosphorous (mg kg-1)	Spearman's rho	-0.256	**	0.789	***	0.785	***	0.607	***	0.62	***	0.555	***	—
8. Sand g/100g (%)	Spearman's rho	0.714	***	-0.435	***	-0.165	*	-0.128		-0.356	***	-0.558	***	-0.264	***	—
9. Silt g/100g (%)	Spearman's rho	-0.384	***	0.468	***	0.174	*	0.149		0.454	***	0.309	***	0.405	***	-0.571	***	—
10. Clay g/100g(%)	Spearman's rho	-0.54	***	0.058		-0.125		-0.128		0.032		0.371	***	-0.066		-0.771	***	0.009		—
11. cfvo 0-5cm	Spearman's rho	-0.004		-0.447	***	-0.666	***	-0.405	***	-0.398	***	-0.112		-0.491	***	-0.064		-0.224	**	0.407	***	—
12. bulk density 0-5 cm	Spearman's rho	-0.341	***	-0.505	***	-0.383	***	-0.642	***	-0.384	***	-0.196	*	-0.466	***	-0.278	***	-0.043		0.4	***	0.199	*	—
13. Vol. water content at -10 kPa	Spearman's rho	0.109		-0.523	***	-0.669	***	-0.662	***	-0.287	***	-0.35	***	-0.497	***	-0.09		-0.057		0.335	***	0.672	***	0.383	***	—
14. Vol. water content at -33 kPa	Spearman's rho	-0.35	***	-0.267	***	-0.246	**	-0.477	***	-0.291	***	0.101		-0.204	*	-0.354	***	-0.05		0.52	***	0.342	***	0.641	***	0.471	***	—
15. Vol. water content at -1500 kPa	Spearman's rho	-0.575	***	0.374	***	0.07		0.094		0.278	***	0.616	***	0.191	*	-0.86	***	0.327	***	0.852	***	0.316	***	0.211	**	0.221	**	0.433	***	—
16. BIO1	Spearman's rho	-0.115		0.359	***	0.565	***	0.23	**	0.372	***	0.093		0.402	***	-0.064		0.383	***	-0.351	***	-0.727	***	0.106		-0.399	***	-0.002		-0.241	**	—
17. BIO2	Spearman's rho	0.041		0.297	***	0.472	***	0.25	**	0.411	***	-0.007		0.382	***	-0.01		0.321	***	-0.317	***	-0.594	***	-0.094		-0.36	***	-0.069		-0.202	*	0.661	***	—
18. BIO3	Spearman's rho	0.47	***	0.532	***	0.474	***	0.714	***	0.539	***	0.259	**	0.386	***	0.288	***	-0.024		-0.415	***	-0.339	***	-0.712	***	-0.457	***	-0.519	***	-0.241	**	0.221	**	0.318	***	—
19. BIO4	Spearman's rho	-0.065		-0.524	***	-0.44	***	-0.31	***	-0.591	***	-0.207	**	-0.531	***	0.13		-0.575	***	0.322	***	0.562	***	0.218	**	0.164	*	0.147		0.103		-0.756	***	-0.501	***	-0.467	***	—
20. BIO5	Spearman's rho	-0.397	***	0.007		0.152		-0.248	**	0.063		-0.007		0.054		-0.389	***	0.315	***	0.174	*	-0.315	***	0.64	***	0.042		0.537	***	0.119		0.73	***	0.46	***	-0.309	***	-0.429	***	—
21. BIO6	Spearman's rho	-0.256	**	0.154		0.253	**	-0.0009889		0.017		0.169	*	0.133		-0.088		0.129		-0.106		-0.421	***	0.309	***	-0.19	*	0.294	***	-0.127		0.723	***	0.12		-0.076		-0.462	***	0.683	***	—
22. BIO7	Spearman's rho	-0.386	***	-0.053		0.071		-0.287	***	0.084		-0.061		0.08		-0.427	***	0.382	***	0.223	**	-0.173	*	0.557	***	0.148		0.5	***	0.21	**	0.436	***	0.59	***	-0.483	***	-0.173	*	0.762	***	0.204	*	—
23. BIO8	Spearman's rho	-0.13		0.328	***	0.544	***	0.204	*	0.35	***	0.062		0.402	***	-0.087		0.419	***	-0.349	***	-0.728	***	0.113		-0.399	***	-0.007		-0.244	**	0.988	***	0.713	***	0.195	*	-0.751	***	0.738	***	0.67	***	0.499	***	—
24. BIO9	Spearman's rho	-0.361	***	-0.06		0.028		-0.189	*	-0.087		0.145		-0.094		-0.168	*	0.008		0.153		-0.072		0.654	***	0.038		0.542	***	0.111		0.467	***	0.028		-0.262	***	-0.109		0.706	***	0.71	***	0.341	***	0.408	***	—
25. BIO10	Spearman's rho	-0.146		0.343	***	0.539	***	0.215	**	0.357	***	0.098		0.371	***	-0.091		0.388	***	-0.317	***	-0.694	***	0.145		-0.365	***	0.029		-0.219	**	0.991	***	0.616	***	0.178	*	-0.737	***	0.745	***	0.752	***	0.45	***	0.979	***	0.498	***
26. BIO11	Spearman's rho	-0.114		0.359	***	0.545	***	0.23	**	0.369	***	0.1		0.399	***	-0.074		0.39	***	-0.343	***	-0.696	***	0.101		-0.371	***	0.01		-0.229	**	0.995	***	0.638	***	0.233	**	-0.774	***	0.728	***	0.737	***	0.421	***	0.983	***	0.467	***
27. BIO12	Spearman's rho	0.179	*	0.456	***	0.392	***	0.595	***	0.231	**	0.201	*	0.449	***	0.295	***	-0.055		-0.38	***	-0.208	**	-0.802	***	-0.501	***	-0.647	***	-0.256	**	-0.077		-0.224	**	0.581	***	-0.121		-0.597	***	-0.114		-0.709	***	-0.116		-0.393	***
28. BIO13	Spearman's rho	0.042		-0.29	***	-0.407	***	-0.128		-0.461	***	0.018		-0.325	***	0.141		-0.49	***	0.269	***	0.665	***	-0.125		0.208	**	0.024		0.168	*	-0.828	***	-0.84	***	-0.097		0.68	***	-0.657	***	-0.401	***	-0.667	***	-0.857	***	-0.198	*
29. BIO14	Spearman's rho	0.34	***	0.521	***	0.446	***	0.672	***	0.359	***	0.215	**	0.479	***	0.382	***	-0.055		-0.495	***	-0.276	***	-0.848	***	-0.509	***	-0.682	***	-0.322	***	0.057		-0.01		0.799	***	-0.289	***	-0.541	***	-0.074		-0.701	***	0.01		-0.37	***
30. BIO15	Spearman's rho	-0.278	***	-0.578	***	-0.558	***	-0.71	***	-0.387	***	-0.271	***	-0.529	***	-0.31	***	0.103		0.418	***	0.429	***	0.746	***	0.637	***	0.62	***	0.272	***	-0.209	**	-0.2	*	-0.83	***	0.317	***	0.356	***	-0.036		0.55	***	-0.173	*	0.257	**
31. BIO16	Spearman's rho	0.044		-0.261	**	-0.39	***	-0.086		-0.428	***	0.009		-0.3	***	0.164	*	-0.468	***	0.214	**	0.636	***	-0.162	*	0.159	*	-0.008		0.118		-0.8	***	-0.813	***	-0.069		0.661	***	-0.649	***	-0.382	***	-0.665	***	-0.83	***	-0.2	*
32. BIO17	Spearman's rho	0.339	***	0.523	***	0.441	***	0.671	***	0.36	***	0.224	**	0.473	***	0.378	***	-0.054		-0.489	***	-0.276	***	-0.848	***	-0.511	***	-0.686	***	-0.315	***	0.06		-0.014		0.804	***	-0.291	***	-0.541	***	-0.065		-0.704	***	0.015		-0.367	***
33. BIO18	Spearman's rho	0.319	***	0.465	***	0.559	***	0.625	***	0.318	***	0.139		0.516	***	0.323	***	-0.058		-0.484	***	-0.499	***	-0.777	***	-0.637	***	-0.655	***	-0.4	***	0.237	**	0.157	*	0.7	***	-0.361	***	-0.348	***	0.035		-0.468	***	0.232	**	-0.431	***
34. BIO19	Spearman's rho	0.11		-0.114		-0.285	***	0.031		-0.278	***	0.075		-0.222	**	0.204	*	-0.507	***	0.194	*	0.537	***	-0.176	*	0.138		-0.035		0.114		-0.684	***	-0.76	***	0.081		0.551	***	-0.598	***	-0.263	***	-0.727	***	-0.755	***	-0.022
35. Aridity Index	Spearman's rho	0.233	**	0.481	***	0.42	***	0.618	***	0.259	**	0.18	*	0.485	***	0.326	***	-0.017		-0.449	***	-0.265	***	-0.856	***	-0.535	***	-0.704	***	-0.299	***	-0.04		-0.102		0.658	***	-0.178	*	-0.601	***	-0.137		-0.686	***	-0.067		-0.461	***
36. Observed Heterozygosity	Spearman's rho	0.335	***	0.246	**	0.283	***	0.315	***	0.17	*	-0.051		0.26	**	0.322	***	0.049		-0.469	***	-0.28	***	-0.548	***	-0.339	***	-0.488	***	-0.354	***	0.152		0.141		0.478	***	-0.271	***	-0.248	**	-0.005		-0.305	***	0.142		-0.32	***
* p < .05, ** p < .01, *** p < .001
positive correlation
negative correlation
[truncated: 19 more columns]
