# Supplementary material for: Adaptive genetic variation for climate-resilient breeding in cacao (Theobroma cacao L.)
Source: Research Square preprint supplement (doi:10.21203/rs.3.rs-7906520/v1), 2025-11-11
Supplement: Supplementary file 2 [file 76be2d6eb6ef58e53077f742.docx]

**Supplementary Tables S1-S5**

**Table S1.** List of cacao (*Theobroma cacao* L*.)* accessions used for genetic environmental association analysis and their geographic locations based on International Cocoa Germplasm Database <https://research.reading.ac.uk/cocoa/icgd/> (Turnbull & Hadley, 2025) and (Motamayor et al., 2008).

| **Sample ID** | **Clone ID** | **Latitude** | **Longitude** |
| --- | --- | --- | --- |
| sample01 | EBC 10 /S-401 | -0.33 | -72.1 |
| sample02 | EBC 148 | -1.2 | -69.26 |
| sample03 | AGU 3339 [CHA] | -0.1 | -77.1 |
| sample04 | COCA 3348 /52 [CHA] | -0.55 | -77 |
| sample05 | NAPO 25 [CHA] | -0.3 | -77 |
| sample06 | SPA 16 [COL] | -2.48 | -73.669 |
| sample07 | SPA 7 [COL] | -2.48 | -73.669 |
| sample08 | SPA 10 | -2.48 | -73.669 |
| sample09 | SPA 12 | -2.48 | -73.669 |
| sample10 | APA 4 | -2.48 | -76.05 |
| sample11 | CUR 3 [CHA] | -0.53 | -77 |
| sample12 | LCT EEN 15 /S-3 | -0.35 | -77.5 |
| sample13 | LCT EEN 162 /S-1010 | -0.25 | -77.2 |
| sample14 | LCT EEN 163 /D | -0.25 | -77.2 |
| sample15 | LCT EEN 237 | -1.3 | -77.27 |
| sample16 | LCT EEN 261 /S-4 | -1.58 | -76.33 |
| sample17 | LCT EEN 302 | -2.32 | -78.1 |
| sample18 | LCT EEN 341 /S-2 | -2.491 | -78.149 |
| sample19 | LCT EEN 368 | -2.12 | -76.12 |
| sample20 | LCT EEN 37 /A | -0.24 | -76.34 |
| sample21 | LCT EEN 37 /F | -0.24 | -76.34 |
| sample22 | LCT EEN 37 /I | -0.24 | -76.34 |
| sample23 | LCT EEN 401 | -0.5 | -75.31 |
| sample24 | LCT EEN 412 | -0.55 | -75.15 |
| sample25 | MO 109 | -4.8 | -76.8 |
| sample26 | MO 20 | -3.75 | -77.17 |
| sample27 | MO 4 | -4.8 | -76.8 |
| sample28 | MO 9 | -4.8 | -76.8 |
| sample29 | AMAZ 11 | -3.75 | -73.17 |
| sample30 | AMAZ 12 | -3.75 | -73.17 |
| sample31 | IMC 103 | -3.78 | -73.2 |
| sample32 | IMC 107 | -3.78 | -73.2 |
| sample33 | IMC 11 | -3.78 | -73.2 |
| sample34 | IMC 14 | -3.78 | -73.2 |
| sample35 | IMC 16 | -3.78 | -73.2 |
| sample36 | IMC 2 | -3.78 | -73.2 |
| sample37 | IMC 20 | -3.78 | -73.2 |
| sample38 | IMC 27 | -3.78 | -73.2 |
| sample39 | IMC 31 | -3.78 | -73.2 |
| sample40 | IMC 33 | -3.78 | -73.2 |
| sample41 | IMC 38 | -3.78 | -73.2 |
| sample42 | IMC 42 | -3.78 | -73.2 |
| sample43 | IMC 47 | -3.78 | -73.2 |
| sample44 | IMC 50 | -3.78 | -73.2 |
| sample45 | IMC 54 | -3.78 | -73.2 |
| sample46 | IMC 55 | -3.78 | -73.2 |
| sample47 | IMC 57 | -3.78 | -73.2 |
| sample48 | IMC 58 | -3.78 | -73.2 |
| sample49 | IMC 6 | -3.78 | -73.2 |
| sample50 | IMC 60 | -3.78 | -73.2 |
| sample51 | IMC 63 | -3.78 | -73.2 |
| sample52 | IMC 67 | -3.5 | -73 |
| sample53 | IMC 71 | -3.78 | -73.2 |
| sample54 | IMC 78 | -3.78 | -73.2 |
| sample55 | IMC 85 | -3.78 | -73.2 |
| sample56 | IMC 9 | -3.78 | -73.2 |
| sample57 | NA 111 | -3.78 | -73.35 |
| sample58 | NA 149 | -3.78 | -73.35 |
| sample59 | NA 232 | -3.78 | -73.35 |
| sample60 | NA 26 | -3.78 | -73.35 |
| sample61 | NA 33 | -3.78 | -73.35 |
| sample62 | NA 34 | -3.3 | -73 |
| sample63 | NA 387 | -3.3 | -73 |
| sample64 | NA 399 | -3.78 | -73.35 |
| sample65 | NA 670 | -3.78 | -73.35 |
| sample66 | NA 70 | -3.78 | -73.35 |
| sample67 | NA 702 | -3.78 | -73.35 |
| sample68 | NA 710 | -3.78 | -73.35 |
| sample69 | NA 824 | -3.78 | -73.35 |
| sample70 | NA 916 | -3.78 | -73.35 |
| sample71 | POUND 12 | -3.45 | -73.1 |
| sample72 | POUND 12 /A | -3.78 | -73.35 |
| sample73 | POUND 16 /B | -3.78 | -73.35 |
| sample74 | POUND 18 | -3.45 | -73.1 |
| sample75 | POUND 7 | -3.45 | -73.1 |
| sample76 | POUND 7 /B | -3.45 | -73.1 |
| sample77 | PA 107 [PER] | -4.57 | -74.46 |
| sample78 | PA 115 [PER] | -4.57 | -74.46 |
| sample79 | PA 120 [PER] | -4.57 | -74.46 |
| sample80 | PA 121 [PER] | -4.57 | -74.46 |
| sample81 | PA 124 [PER] | -4.57 | -74.46 |
| sample82 | PA 126 [PER] | -4.57 | -74.46 |
| sample83 | PA 13 [PER] | -4.57 | -74.46 |
| sample84 | PA 136 [PER] | -4.57 | -74.46 |
| sample85 | PA 150 [PER] | -4.57 | -74.46 |
| sample86 | PA 156 [PER] | -4.57 | -74.46 |
| sample87 | PA 16 [PER] | -4.57 | -74.46 |
| sample88 | PA 169 [PER] | -4.57 | -74.46 |
| sample89 | PA 175 [PER] | -4.6 | -74.6 |
| sample90 | PA 179 [PER] | -4.57 | -74.46 |
| sample91 | PA 188 [PER] | -4.57 | -74.46 |
| sample92 | PA 195 [PER] | -4.57 | -74.46 |
| sample93 | PA 279 [PER] | -4.57 | -74.46 |
| sample94 | PA 289 [PER] | -4.57 | -74.46 |
| sample95 | PA 294 [PER] | -4.57 | -74.46 |
| sample96 | PA 299 [PER] | -4.57 | -74.46 |
| sample97 | PA 3 [PER] | -4.57 | -74.46 |
| sample98 | PA 30 [PER] | -4.57 | -74.46 |
| sample99 | PA 300 [PER] | -4.57 | -74.46 |
| sample100 | PA 310 [PER] | -4.57 | -74.46 |
| sample101 | PA 4 [PER] | -4.57 | -74.46 |
| sample102 | PA 51 [PER] | -4.57 | -74.46 |
| sample103 | PA 56 [PER] | -4.57 | -74.46 |
| sample104 | PA 67 [PER] | -4.57 | -74.46 |
| sample105 | PA 7 [PER] | -4.57 | -74.46 |
| sample106 | PA 70 [PER] | -4.57 | -74.46 |
| sample107 | PA 71 [PER] | -4.57 | -74.46 |
| sample108 | PA 88 [PER] | -4.57 | -74.46 |
| sample109 | TAP 10 [CHA] | -5 | -73.5 |
| sample110 | TAP 12 [CHA] | -5 | -73.5 |
| sample111 | SCA 10 | -7.34 | -75.01 |
| sample112 | SCA 11 | -7.34 | -75.01 |
| sample113 | SCA 12 | -7.34 | -75.01 |
| sample114 | SCA 19 | -7.34 | -75.01 |
| sample115 | SCA 6 | -7.34 | -75.01 |
| sample116 | SCA 9 | -7.34 | -75.01 |
| sample117 | U 26 [PER] | -5.12 | -73.83 |
| sample118 | U 45 [PER] | -8.6 | -74.3 |
| sample119 | U 70 [PER] | -12.08 | -72.67 |
| sample120 | C SUL 3 | -8.1 | -72.5 |
| sample121 | RB 37 [BRA] | -9.3 | -67.5 |
| sample122 | RB 39 [BRA] | -9.3 | -67.5 |
| sample123 | RB 41 [BRA] | -9.59 | -67.49 |
| sample124 | B7 A2 [GUF] | 2.16 | -53.18 |
| sample125 | B7 A6 [GUF] | 2.2 | -53.28 |
| sample126 | B7 B3 [GUF] | 2.2 | -53.28 |
| sample127 | B7 B5 [GUF] | 2.1894 | -53.2611 |
| sample128 | ELP 20 A | 2.316667 | -52.9794 |
| sample129 | ELP 37 Aï¿½ | 2.3025 | -52.9447 |
| sample130 | GU 114 /P | 2.328333 | -53.4178 |
| sample131 | GU 125 /C | 2.355 | -53.2497 |
| sample132 | GU 133 /C | 2.355 | -53.2389 |
| sample133 | GU 134 /B | 2.355 | -53.2389 |
| sample134 | GU 136 /H | 2.355 | -53.2389 |
| sample135 | GU 139 /A | 2.355 | -53.2389 |
| sample136 | GU 144 /C | 2.355 | -53.2389 |
| sample137 | GU 147 /H | 2.355 | -53.2389 |
| sample138 | GU 154 L | 2.355 | -53.2281 |
| sample139 | GU 168 /H | 2.359444 | -53.1939 |
| sample140 | GU 171 /C | 2.359444 | -53.1939 |
| sample141 | GU 183 /G | 2.363889 | -53.1886 |
| sample142 | GU 207 /H | 2.349 | -53.198 |
| sample143 | GU 219 /F | 2.3 | -56.1 |
| sample144 | GU 221 /C | 2.3 | -56.1 |
| sample145 | GU 226 /V | 2.3 | -56.1 |
| sample146 | GU 241 /P | 2.359444 | -53.1958 |
| sample147 | GU 249 /H | 2.36 | -53.192 |
| sample148 | GU 254 /A | 2.355 | -53.221 |
| sample149 | GU 255 /V | 2.355 | -53.221 |
| sample150 | GU 259 /C | 2.355 | -53.221 |
| sample151 | GU 261 /P | 2.355 | -53.221 |
| sample152 | GU 277 /G | 2.355 | -53.221 |
| sample153 | GU 296 /H | 2.357 | -53.206 |
| sample154 | GU 310 /P | 2.363 | -53.193 |
| sample155 | GU 322 /P | 2.363 | -53.193 |
| sample156 | KER 3 | 2.187 | -53.031 |
| sample157 | KER 6 | 2.178 | -53 |

**Table S2.** Climatic and soils variables used for genetic environmental association analysis in cacao *Theobroma cacao* L. using the LFMM and LFMM2 methods.

| **ID** | **Variable** | **Type** | **Source** |
| --- | --- | --- | --- |
| BIO1 | Annual Mean Temperature | climatic | (Fick & Hijmans, 2017) |
| BIO2 | Mean Diurnal Range (Mean of monthly (max temp - min temp)) | climatic |
| BIO3 | Isothermality (BIO2/BIO7) (×100) | climatic |
| BIO4 | Temperature Seasonality (standard deviation ×100) | climatic |
| BIO5 | Max Temperature of Warmest Month | climatic |
| BIO6 | Min Temperature of Coldest Month | climatic |
| BIO7 | Temperature Annual Range (BIO5-BIO6) | climatic |
| BIO8 | Mean Temperature of Wettest Quarter | climatic |
| BIO9 | Mean Temperature of Driest Quarter | climatic |
| BIO10 | Mean Temperature of Warmest Quarter | climatic |
| BIO11 | Mean Temperature of Coldest Quarter | climatic |
| BIO12 | Annual Precipitation | climatic |
| BIO13 | Precipitation of Wettest Month | climatic |
| BIO14 | Precipitation of Driest Month | climatic |
| BIO15 | Precipitation Seasonality (Coefficient of Variation) | climatic |
| BIO16 | Precipitation of Wettest Quarter | climatic |
| BIO17 | Precipitation of Driest Quarter | climatic |
| BIO18 | Precipitation of Warmest Quarter | climatic |
| BIO19 | Precipitation of Coldest Quarter | climatic |
| Global-AI | Aridity Index | climatic | (Zomer et al., 2022) |
| pH | soil pH (measured in water) | Soil | (Poggio et al., 2021) |
| cec | cation exchange capacity (mmol(c)/kg) | Soil |
| soc | soil organic carbon content in the fine earth fraction centration (dg/kg) | Soil |
| ocd | organic carbon density (hg/m³) | Soil |
| ocs | Organic carbon stocks (ton/ha) | Soil |
| nitrogen | Total nitrogen (N) (cg/kg) | Soil |
| sand | proportion of sand particles (>0.05/0.063 mm) (g/kg) | Soil |
| silt | proportion of silt particles (≥ 0.002 mm and ≤ 0.05/0.063 mm) (g/kg) | Soil |
| clay | proportion of clay particles (< 0.002 mm) (g/kg) | Soil |
| bulk density | soil bulk density (cg/cm³) | Soil |
| cfvo | volumetric fraction of coarse fragments (> 2mm) (cm3/dm3) | Soil |
| wv1500 | volumetric water retention at 15 000 cm suction (%) | Soil | (Turek et al., 2023) |
| wv0033 | volumetric water retention at 330 cm suction (%) | Soil |
| wv0010 | volumetric water retention at 100 cm suction (%) | Soil |
| Phosphorous | Available phosphorous (mg/kg) | Soil | (Darela-Filho et al., 2024) |

**Table S3.** Cacao (*Theobroma cacao* L.) SNPs significantly associated with bioclimatic variables identified by *lfmm2* and *lfmm* methods using the R package *LEA* (version 3.18) (Frichot et al., 2015).

| **SNP** | **Bioclimatic Variable** | ***P*-value** |
| --- | --- | --- |
| *lfmm2* | | |
| Tcm009s02031341* | BIO5* | 0.044 |
| BIO7 | 0.011 |
| BIO12 | 0.002 |
| BIO14 | 0.023 |
| BIO17 | 0.003 |
| BIO19 | 0.000 |
| Tcm006s13222057 | BIO18 | 0.042 |
| Tcm008s05909121 | BIO19 | 0.027 |
| Tcm004s00289192 | BIO19 | 0.003 |
| *lfmm* | | |
| Tcm009s02031341* | BIO5* | 0.012 |
| Tcm002s08269115 | BIO6 | 0.011 |
| Tcm006s13371871 | BIO6 | 0.019 |

* SNPs and corresponding variables identified by both *lfmm2* and *lfmm* methods.

**Table S4.** Correlation matrix between cacao (*Theobroma cacao* L.) mean individual heterozygosity and environmental variables (climatic and soil variables. [Supplementary_Table_S4_Excel File]

**Table S5.** Cacao (*Theobroma cacao* L.) SNPs significantly associated with soil variables identified by *lfmm2* and *lfmm* methods using the R package *LEA* (version 3.18) (Frichot et al., 2015).

| **SNP** | **Soil Variable** | ***P*-value** |
| --- | --- | --- |
| *lfmm2* | | |
| Tcm006s13222057 | cec | 0.002 |
| nitrogen | 0.001 |
| organic carbon density | 0.015 |
| organic carbon stocks | 0.000 |
| soc | 0.003 |
| phosphorous | 0.000 |
| cvfo | 0.016 |
| Tcm004s00615809***** | cec | 0.000 |
| nitrogen | 0.000 |
| organic carbon stocks | 0.002 |
| water_at_1500cm***** | 0.003 |
| phosphorous | 0.000 |
| Tcm010s00936105 | cec | 0.045 |
| nitrogen | 0.043 |
| TcSNP1870 | nitrogen | 0.006 |
| *lfmm* | | |
| Tcm004s00615809***** | sand | 0.021 |
| water_at_1500cm***** | 0.003 |
| Tcm009s08066239 | sand | 0.021 |
| water_at_330cm | 0.032 |

* SNPs and corresponding variables identified by both *lfmm2* and *lfmm* methods.

**References**

Darela-Filho, J. P., Rammig, A., Fleischer, K., Reichert, T., Lugli, L. F., Quesada, C. A., Hurtarte, L. C. C., de Paula, M. D., & Lapola, D. M. (2024). Reference maps of soil phosphorus for the pan-Amazon region. *Earth System Science Data*, *16*(1), 715-729. <https://doi.org/10.5194/essd-16-715-2024>

Fick, S. E., & Hijmans, R. J. (2017). WorldClim 2: new 1‐km spatial resolution climate surfaces for global land areas. *International Journal of Climatology*, *37*(12), 4302–4315. <https://doi.org/10.1002/joc.5086>

Frichot, E., François, O., & O'Meara, B. (2015). LEA: An R package for landscape and ecological association studies. *Methods in Ecology and Evolution*, *6*(8), 925-929. <https://doi.org/https://doi.org/10.1111/2041-210X.12382>

Motamayor, J. C., Lachenaud, P., da Silva E Mota, J. W., Loor, R., Kuhn, D. N., Brown, J. S., & Schnell, R. J. (2008). Geographic and genetic population differentiation of the Amazonian chocolate tree (*Theobroma cacao* L). *PloS one*, *3*(10), e3311. <https://doi.org/10.1371/journal.pone.0003311>

Poggio, L., de Sousa, L. M., Batjes, N. H., Heuvelink, G. B. M., Kempen, B., Ribeiro, E., & Rossiter, D. (2021). SoilGrids 2.0: producing soil information for the globe with quantified spatial uncertainty. *Soil*, *7*(1), 217-240. <https://doi.org/10.5194/soil-7-217-2021>

Turek, M. E., Poggio, L., Batjes, N. H., Armindo, R. A., de Jong van Lier, Q., de Sousa, L., & Heuvelink, G. B. M. (2023). Global mapping of volumetric water retention at 100, 330 and 15 000 cm suction using the WoSIS database. *International Soil and Water Conservation Research*, *11*(2), 225-239. <https://doi.org/10.1016/j.iswcr.2022.08.001>

Turnbull, C. J., & Hadley, P. (2025). *International Cocoa Germplasm Database (ICGD). [Online Database]*. Retrieved 24.11.2024 from <https://www.icgd.reading.ac.uk/index.php>

Zomer, R. J., Xu, J., & Trabucco, A. (2022). Version 3 of the Global Aridity Index and Potential Evapotranspiration Database. *Sci Data*, *9*(1), 409. <https://doi.org/10.1038/s41597-022-01493-1>
